# Supplementary material for: Effect of magnetic field on the rate performance of a Fe2O3/LiFePO4 composite cathode for Li-ion batteries
Source: Royal Society of Chemistry journal article supplement (doi:10.1039/d4ra06707j), 2024-01-01
Supplement: d4ra06707j1.pdf [file d4ra06707j1.pdf]

## Supporting Information

### The effect of magnetic field on the rate performance of Fe<sub>2</sub>O<sub>3</sub>/LiFePO<sub>4</sub> composite cathode for Li-ion batteries

Emmanuel Iheonu Nduka<sup>1&</sup>, Nazgul Assan<sup>1&</sup>, Mukagali Yegamkulov<sup>2</sup>, Aliya Mukanova<sup>1,2</sup>, Zhumabay Bakenov<sup>1,2,3\*</sup>

<sup>1</sup> Department of Chemical and Materials Engineering, School of Engineering and Digital Sciences, Nazarbayev University, Astana 010000, Kazakhstan

<sup>2</sup> National Laboratory Astana, Nazarbayev University, Astana 010000, Kazakhstan

<sup>3</sup> Institute of Batteries LLC, Nazarbayev University, Astana 010000, Kazakhstan

&E.I.N., N.A. – these authors contributed equally

\*Corresponding Author: [zbakenov@nu.edu.kz](mailto:zbakenov@nu.edu.kz)

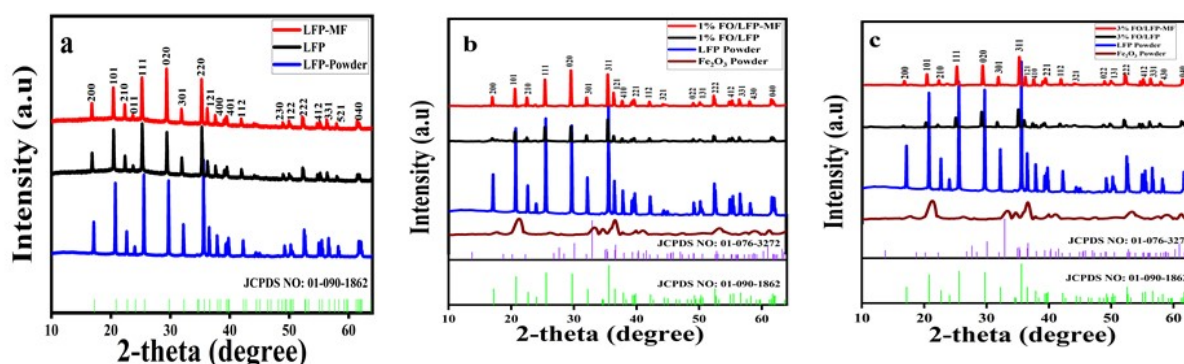

Fig. S1. XRD patterns of cathodes: (a) LFP and LFP-MF; (b) 1%FO/LFP and 1%FO/LFP-MF; and (c) 3%FO/LFP and 3%FO/LFP-MF

#### Diffusion coefficient of Li ions (D) in the electrode:

Fig. S2 depicts the associations between peak currents and the square root of scan rate for LFP-MF and LFP-WMF. The Randles-Sevcik equation was used to calculate the diffusion coefficient of Li ions (D) for an electrode:

$$I_p = 2.59 \times 10^5 \times A \times C \times D_{Li^+}^{0.5} \times n^{1.5} \times V^{0.5}$$

The variables are defined as follows:  $I_p$  is the peak current,  $A$  is the effective area of the electrode,  $C$  is the bulk concentration of Li<sup>+</sup> in the electrode,  $D_{Li^+}^{0.5}$  is the Li<sup>+</sup> diffusion coefficient,  $n$  is the number of electrons involved in the redox process, and  $V$  is the CV potential scan rate.

$$D_{Li+}^{0.5} = \frac{I_p}{2.59 \times 10^5 \times A \times C \times n^{1.5} \times V^{0.5}}$$

$$\text{Slope} = \frac{I_p}{V^{0.5}}$$

Due to the different values of the oxidation and reduction peaks,  $D_{Li+}^{0.5}$  can be estimated more accurately by averaging the absolute values of the slopes ( $M_{avg}$ ).

$$(M_{avg}) = \frac{\text{Oxidation peak slope} + \text{Reduction peak slope}}{2}$$

For instance, the slope of LFP-MF is  $4.1376 \times 10^{-4}$ , and LFP-WMF is  $2.143 \times 10^{-4}$ .

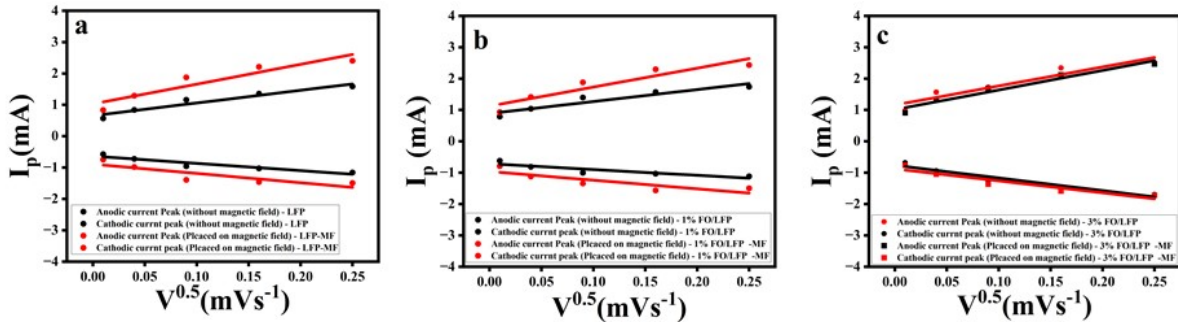

Fig. S2. Relationship between  $I_p$  and  $V^{0.5}$  established using CV curves for (a) LFP and LFP-MF; (b) 1%FO/LFP and 1%FO/LFP-MF; and (c) 3%FO/LFP and 3%FO/LFP-MF

**Table S1: SEM Cross-Sectional thickness and TEM Freeze-dried  $Fe_2O_3$  particle size calculation**

| S/N      | LFP-WMF ( $\mu\text{m}$ ) | LFP-MF ( $\mu\text{m}$ ) | LFP+1% $Fe_2O_3$ -WMF ( $\mu\text{m}$ ) | LFP+1% $Fe_2O_3$ -MF ( $\mu\text{m}$ ) | LFP+3% $Fe_2O_3$ -WMF ( $\mu\text{m}$ ) | LFP+3% $Fe_2O_3$ -MF ( $\mu\text{m}$ ) | Freeze-dried $Fe_2O_3$ (nm) |
|----------|---------------------------|--------------------------|-----------------------------------------|----------------------------------------|-----------------------------------------|----------------------------------------|-----------------------------|
| Sample 1 | 15.01                     | 14.24                    | 15.75                                   | 13.29                                  | 18.5                                    | 17.65                                  | 91.27                       |

|          |                  |                  |                  |                  |                  |                  |                  |
|----------|------------------|------------------|------------------|------------------|------------------|------------------|------------------|
| Sample 2 | 15.56            | 14.91            | 13.84            | 12.51            | 13.28            | 12.16            | 94.06            |
| Sample 3 | 17.33            | 15.75            | 18.15            | 16.71            | 17.4             | 16.98            | 82.84            |
| Sample 4 | 17.77            | 15.38            | 15.49            | 14.5             | 17.2             | 15.95            | 96.12            |
| Sample 5 | 17.08            | 18.98            | 15.18            | 14.63            | 16.75            | 16.97            | 91.30            |
| Average  | $16.55 \pm 0.54$ | $15.85 \pm 0.82$ | $15.68 \pm 0.70$ | $14.33 \pm 0.71$ | $16.63 \pm 0.88$ | $15.94 \pm 0.98$ | $91.18 \pm 2.26$ |

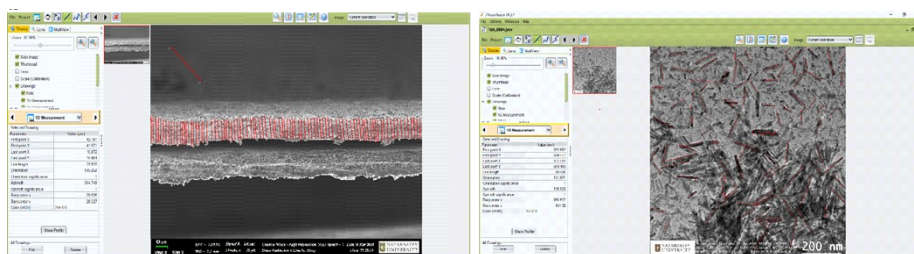

Fig. S3. (a) SEM cross-sectional thickness and (b) TEM freeze-dried FO particle size calculation.

JMicroVision software (v1.3.4).

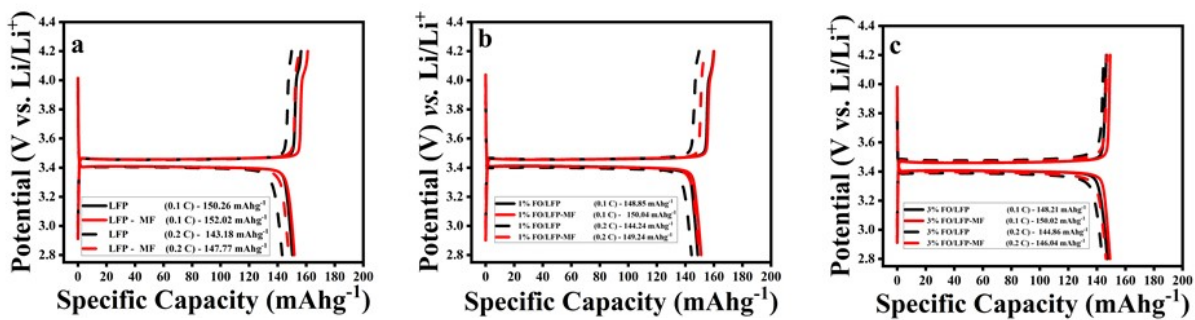

Fig. S4. Potential profiles for LFP cathodes at 0.1 and 0.2 C using the 4<sup>th</sup> cycle: (a) LFP and LFP-MF; (b) 1%FO/LFP and 1%FO/LFP-MF; (c) 3%FO/LFP and 3%FO/LFP-MF.

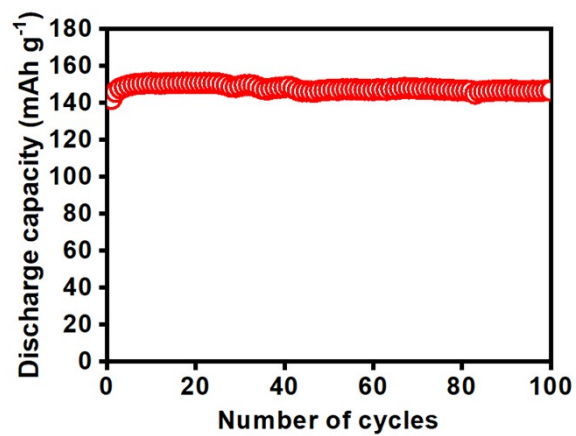

Fig. S5. Prolonged Cycling Performance of 1% FO/LFP-MF at 0.2 C.

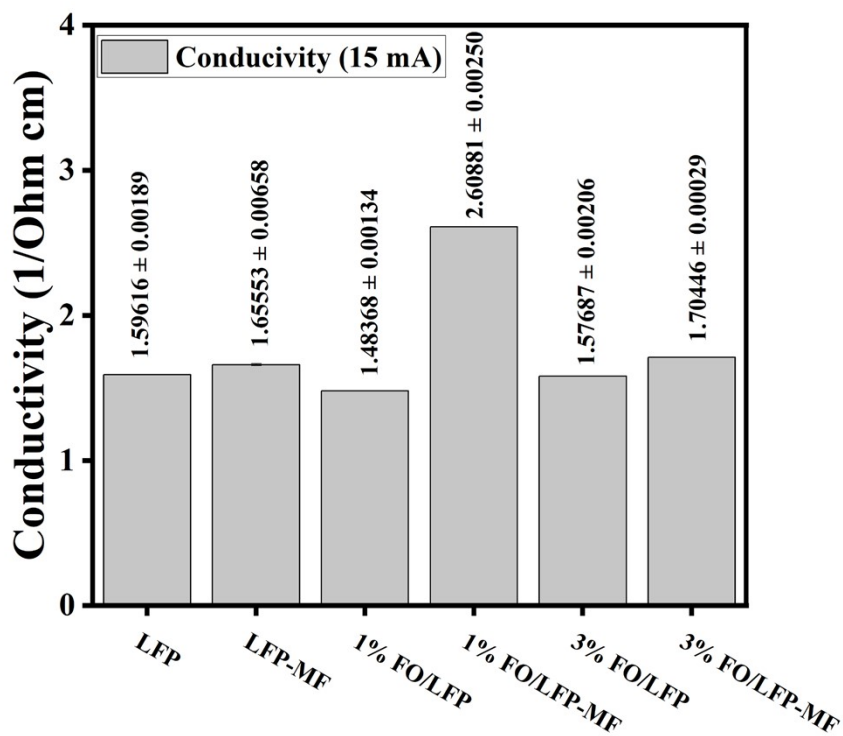

Fig.S6. Hall effect measurement results of LFP, 1% FO/LFP and 3% FO/LFP samples with/without MF at 15 mA
